# Supplementary material
Source: PubMed Central journal article supplement (PMC2778041)
Supplement: NIHMS79268-supplement-supp_tables.pdf [file NIHMS79268-supplement-supp_tables.pdf]

Supplementary Table S1. PCR primers used for detection of *PDYN* SNPs

| SNP ID     | Location | Primer sequence                                                    |
|------------|----------|--------------------------------------------------------------------|
| rs1997794  | Promoter | 5'-GTCCCTCTCTCCTTGTGTTTCT-3' (F)<br>5'-GCCCCCTCTGGATGTTACCT-3' (R) |
| rs6045819  | Exon 4   | 5'-CCCAAGGAGCAGGTCAAAC-3' (F)<br>5'-TCCCACGCAGAAGAGAGATA-3' (R)    |
| rs10485703 | 3'UTR    | 5'-TTTGGAGACGATGCTTTAGGTA-3' (F)                                   |
| rs910080   | 3'UTR    | 5'-CTTTCTGGTTTTATTTTGAGACA-3' (R)                                  |
| rs910079   | 3'UTR    |                                                                    |
| rs2235749  | 3'UTR    |                                                                    |

Supplementary Table S2.

## Association test of PDYN variants in Caucasians

|                             | Genotype |    |    | Point-wise<br><i>P</i> value | Alleles |     | Point-wise<br><i>P</i> value |
|-----------------------------|----------|----|----|------------------------------|---------|-----|------------------------------|
|                             | GG       | AG | AA |                              | G       | A   |                              |
| <b>rs1997794 (A&gt;G)</b>   |          |    |    |                              |         |     |                              |
| Controls                    | 9        | 23 | 33 |                              | 41      | 89  |                              |
| Cocaine dependent           | 3        | 7  | 7  | 0.775                        | 13      | 21  | 0.459                        |
| Cocaine/Alcohol codependent | 6        | 10 | 8  | 0.268                        | 22      | 26  | 0.077                        |
| Combined cases              | 9        | 17 | 15 | 0.311                        | 35      | 47  | 0.099                        |
| <b>rs6045819 (T&gt;C)</b>   |          |    |    |                              |         |     |                              |
|                             | CC       | TC | TT |                              | C       | T   |                              |
| Controls                    | 1        | 7  | 57 |                              | 9       | 121 |                              |
| Cocaine dependent           | 0        | 6  | 11 | 0.044                        | 6       | 28  | 0.053                        |
| Cocaine/Alcohol codependent | 0        | 7  | 17 |                              | 7       | 41  |                              |
| Combined cases              | 0        | 13 | 28 | 0.022                        | 13      | 69  | 0.038                        |
| <b>rs10485703 (T&gt;C)</b>  |          |    |    |                              |         |     |                              |
|                             | CC       | TC | TT |                              | C       | T   |                              |
| Controls                    | 1        | 6  | 58 |                              | 8       | 122 |                              |
| Cocaine dependent           | 0        | 6  | 11 | 0.024                        | 6       | 28  | 0.033                        |
| Cocaine/Alcohol codependent | 0        | 5  | 19 |                              | 5       | 43  |                              |
| Combined cases              | 0        | 11 | 30 | 0.044                        | 11      | 71  | 0.072                        |
| <b>rs910080 (T&gt;C)</b>    |          |    |    |                              |         |     |                              |
|                             | CC       | TC | TT |                              | C       | T   |                              |
| Controls                    | 4        | 19 | 42 |                              | 27      | 103 |                              |
| Cocaine dependent           | 2        | 10 | 5  | 0.033                        | 14      | 20  | 0.014                        |
| Cocaine/Alcohol codependent | 1        | 15 | 8  | 0.016                        | 17      | 31  | 0.044                        |
| Combined cases              | 3        | 25 | 13 | 0.003                        | 31      | 51  | 0.007                        |
| <b>rs910079 (T&gt;C)</b>    |          |    |    |                              |         |     |                              |
|                             | CC       | TC | TT |                              | C       | T   |                              |
| Controls                    | 4        | 19 | 42 |                              | 27      | 103 |                              |
| Cocaine dependent           | 2        | 10 | 5  | 0.033                        | 14      | 20  | 0.014                        |
| Cocaine/Alcohol codependent | 2        | 14 | 8  | 0.028                        | 18      | 30  | 0.023                        |
| Combined cases              | 4        | 24 | 13 | 0.004                        | 32      | 50  | 0.004                        |
| <b>rs2235749 (C&gt;T)</b>   |          |    |    |                              |         |     |                              |
|                             | CC       | TC | TT |                              | C       | T   |                              |
| Controls                    | 42       | 19 | 4  |                              | 103     | 27  |                              |
| Cocaine dependent           | 5        | 10 | 2  | 0.033                        | 20      | 14  | 0.014                        |
| Cocaine/Alcohol codependent | 8        | 14 | 2  | 0.028                        | 30      | 18  | 0.023                        |

Supplement Table S3

Association test of *PDYN* variants in African Americans

|                             | Genotype |    |    | Point-wise<br><i>P</i> value | Alleles |     | Point-wise<br><i>P</i> value |
|-----------------------------|----------|----|----|------------------------------|---------|-----|------------------------------|
|                             | GG       | AG | AA |                              | G       | A   |                              |
| <b>rs1997794 (G&gt;A)</b>   |          |    |    |                              |         |     |                              |
| Controls                    | 46       | 27 | 3  |                              | 119     | 33  |                              |
| Cocaine dependent           | 33       | 20 | 8  | 0.145                        | 86      | 36  | 0.139                        |
| Cocaine/Alcohol codependent | 38       | 21 | 8  | 0.199                        | 97      | 37  | 0.247                        |
| Combined cases              | 71       | 41 | 16 | 0.127                        | 183     | 73  | 0.130                        |
| <b>rs6045819 (T&gt;C)</b>   |          |    |    |                              |         |     |                              |
| Controls                    | 8        | 27 | 41 |                              | 43      | 109 |                              |
| Cocaine dependent           | 5        | 24 | 32 | 0.844                        | 34      | 88  | 0.939                        |
| Cocaine/Alcohol codependent | 6        | 23 | 38 | 0.926                        | 35      | 99  | 0.681                        |
| Combined cases              | 11       | 47 | 70 | 0.898                        | 69      | 187 | 0.770                        |
| <b>rs10485703 (T&gt;C)</b>  |          |    |    |                              |         |     |                              |
| Controls                    | 1        | 22 | 53 |                              | 24      | 128 |                              |
| Cocaine dependent           | 3        | 11 | 47 | 0.180                        | 17      | 105 | 0.669                        |
| Cocaine/Alcohol codependent | 1        | 16 | 50 | 0.791                        | 18      | 116 | 0.574                        |
| Combined cases              | 4        | 27 | 97 | 0.350                        | 35      | 221 | 0.557                        |
| <b>rs910080 (T&gt;C)</b>    |          |    |    |                              |         |     |                              |
| Controls                    | 17       | 32 | 27 |                              | 66      | 86  |                              |
| Cocaine dependent           | 17       | 31 | 13 | 0.191                        | 65      | 57  | 0.105                        |
| Cocaine/Alcohol codependent | 13       | 27 | 27 | 0.822                        | 53      | 81  | 0.508                        |
| Combined cases              | 30       | 58 | 40 | 0.819                        | 118     | 138 | 0.600                        |
| <b>rs910079 (T&gt;C)</b>    |          |    |    |                              |         |     |                              |
| Controls                    | 19       | 32 | 25 |                              | 70      | 82  |                              |
| Cocaine dependent           | 19       | 31 | 11 | 0.145                        | 69      | 53  | 0.084                        |
| Cocaine/Alcohol codependent | 14       | 29 | 24 | 0.835                        | 57      | 77  | 0.551                        |
| Combined cases              | 33       | 60 | 35 | 0.687                        | 126     | 130 | 0.536                        |
| <b>rs2235749 (C&gt;T)</b>   |          |    |    |                              |         |     |                              |
| Controls                    | 25       | 32 | 19 |                              | 82      | 70  |                              |
| Cocaine dependent           | 11       | 31 | 19 | 0.145                        | 53      | 69  | 0.084                        |
| Cocaine/Alcohol codependent | 24       | 29 | 14 | 0.835                        | 77      | 57  | 0.551                        |
| Combined cases              | 35       | 60 | 33 | 0.687                        | 130     | 126 | 0.536                        |

Supplementary Table S4

| Subject<br>mhbb ID | Ethnicity | Age | HIV<br>status | PMI<br>(h) | SNPs      |           |            |          |          |           | pH    | RIN | PDYN<br>mRNA** |
|--------------------|-----------|-----|---------------|------------|-----------|-----------|------------|----------|----------|-----------|-------|-----|----------------|
|                    |           |     |               |            | rs1997794 | rs6045819 | rs10485703 | rs910080 | rs910079 | rs2235749 |       |     |                |
| 516                | H         | 58  | -             | 13.5       | GG        | TT        | TT         | TC       | TC       | CT        | 6.36  | 7.9 | 2.18           |
| 531                | C         | 44  | -             | 21.5       | AA        | TT        | TT         | TT       | TT       | CC        | 6.52  | 7.0 | 4.48           |
| 553*               | H         | 46  | -             | 16.0       | GG        | TT        | TT         | TT       | TC       | CT        | 6.58  | 8.7 | 2.20           |
| 568                | H         | 48  | -             | 16.0       | AG        | TT        | TT         | TC       | TC       | CT        | 6.62  | 7.0 | 2.12           |
| 577                | C         | 65  | -             | 17.5       | AA        | TT        | TT         | TT       | TT       | CC        | 6.89  | 7.7 | 3.52           |
| 584*               | C         | 53  | -             | 22.5       | AG        | TT        | TT         | TC       | TC       | CT        | 6.72  | 8.3 | 1.62           |
| 588                | H         | 21  | -             | 18.5       | AA        | TT        | TT         | TT       | TT       | CC        | 6.57  | 7.7 | 2.30           |
| 589                | H         | 61  | -             | 6.5        | GG        | TT        | TT         | CC       | CC       | TT        | 6.79  | 7.0 | 1.95           |
| 594                | C         | 57  | -             | 24.0       | AA        | TT        | TT         | TT       | TT       | CC        | 6.84  | 7.0 | 1.84           |
| 601*               | H         | 58  | -             | 16.5       | AG        | TC        | TC         | TC       | TC       | CT        | 6.08  | 7.5 | 1.84           |
| 604                | AA        | 48  | -             | 9.0        | GG        | TC        | TT         | TT       | TT       | CC        | 6.97  | 9.2 | 3.11           |
| 606                | H         | 50  | -             | 16.0       | AA        | TT        | TT         | TT       | TT       | CC        | 6.78  | 7.7 | 3.05           |
| 610                | AA        | 54  | -             | 27.0       | AG        | TT        | TT         | TT       | TT       | CC        | 6.48  | 6.9 | 4.47           |
| 611                | AA        | 59  | -             | 28.4       | GG        | TC        | TC         | TC       | TC       | CT        | 6.03  | 6.3 | 0.72           |
| 613                | A         | 55  | -             | 24.0       | GG        | TT        | TT         | CC       | CC       | TT        | 6.42  | 5.3 | 2.21           |
| 10001              | AA        | 64  | +             | 4.5        | GG        | TT        | TT         | CC       | CC       | TT        | 6.97  | 8.7 | 2.40           |
| 10002              | AA        | 58  | +             | 15.5       | GG        | TT        | TT         | TC       | TC       | CT        | 7.13  | 8.4 | 1.80           |
| 10003              | C         | 45  | +             | 8.0        | AA        | TT        | TT         | TT       | TT       | CC        | 6.35  | 5.0 | 1.99           |
| 10011              | H         | 44  | +             | 8.5        | AG        | TT        | TT         | TC       | TC       | CT        | 6.77  | 8.0 | 1.91           |
| 10013              | C         | 33  | +             | 17.0       | AG        | TT        | TT         | TT       | TT       | CC        | 6.78  | 7.0 | 4.98           |
| 10015              | C         | 33  | +             | 20.0       | AA        | TT        | TT         | TT       | TT       | CC        | 6.79  | 6.9 | 1.93           |
| 10016              | AA        | 58  | +             | 17.0       | AG        | TT        | TT         | TC       | TC       | CT        | 6.07  | 5.6 | 1.68           |
| 10023              | AA        | 53  | +             | 4.5        | GG        | TC        | TC         | CC       | CC       | TT        | 6.79  | 7.1 | 1.45           |
| 10025              | H         | 46  | +             | 7.5        | AA        | TT        | TT         | TT       | TT       | CC        | 6.53  | 7.9 | 3.98           |
| 10027              | H         | 39  | +             | 6.0        | AG        | TT        | TC         | CC       | CC       | TT        | 6.67  | 6.0 | 0.79           |
| 10034              | H         | 49  | +             | 5.0        | AG        | TC        | TC         | TC       | TC       | CT        | 6.74  | 8.2 | 2.01           |
| 10043              | AA        | 34  | +             | 17.0       | GG        | CC        | CC         | CC       | CC       | TT        | 6.64  | 7.7 | 2.06           |
| 10045              | H         | 31  | +             | 9.0        | AG        | TC        | TT         | TT       | TT       | CC        | 6.77  | 5.4 | 1.35           |
| 10052              | AA        | 39  | +             | 5.0        | GG        | TC        | TC         | TC       | TC       | CT        | 7.06  | 8.5 | 1.83           |
| 10063              | H         | 51  | +             | 5.0        | AG        | TT        | TT         | TC       | TC       | CT        | 6.82  | 8.4 | 1.71           |
| 10064              | C         | 49  | +             | 12.0       | AG        | TC        | TC         | TC       | TC       | CT        | 6.24  | 6.2 | 1.59           |
| 10065              | H         | 46  | +             | 7.0        | AG        | TT        | TT         | TC       | TC       | CT        | 6.61  | 7.4 | 2.97           |
| 10066*             | AA        | 54  | +             | 7.0        | AG        | TT        | TT         | TC       | TC       | CT        | 6.37  | 8.5 | 3.09           |
| 10067*             | A         | 28  | +             | 8.0        | AG        | TT        | TT         | TC       | TC       | CT        | 6.74  | 8.2 | 2.59           |
| 10074              | AA        | 41  | +             | 17.5       | GG        | TT        | TT         | TC       | TC       | CT        | 6.53  | 7.8 | 1.91           |
| 10086              | AA        | 48  | +             | 7.5        | GG        | TC        | TT         | TT       | TT       | CC        | 6.71  | 8.2 | 2.77           |
| 10094*             | H         | 41  | +             | 6.5        | AG        | TT        | TT         | TC       | TC       | CT        | 7.38  | 9.5 | 1.8            |
| 10103              | H         | 40  | +             | 6.0        | AA        | TT        | TT         | TT       | TT       | CC        | 6.94  | 6.8 | 2.08           |
| 10133              | C         | 48  | +             | 7.5        | AA        | TT        | TT         | TT       | TT       | CC        | 6.78  | 7.4 | 3.88           |
| 20024              | C         | 62  | +             | 4.0        | AG        | TT        | TT         | TT       | TC       | CT        | 6.74  | 9.4 | 1.27           |
| A9695*             | C         | 48  | -             | 19.5       | GG        | TT        | TT         | TC       | TC       | CT        | -.*** | 6.5 | 0.43           |
| A94189*            | C         | 69  | -             | 15.0       | AG        | TC        | TC         | TC       | TC       | CT        | -.*** | 7.7 | 1.94           |
| A9766              | C         | 61  | -             | 22.0       | GG        | TC        | TC         | CC       | CC       | TT        | -.*** | 8.4 | 2.59           |

\*- tested for allele-specific expression, PMI- postmortem interim (hours),

C- Caucasians, AA- African Americans, H- Hispanics, A- Asians

Brains A9695, A9766, and A94189 from from Alzheimer's Disease Research Center (Mount Sinai Medical Center, New York)

\*\* - PDYN mRNA levels are shown as pg/ $\mu$ g total RNA; \*\*\* - specimens provided in guanidine thiocyanate

Supplement Table S5

Peak area ratios (T/C) for genomic DNA and cDNA  
using the reporter SNP rs 910079 in heterozygous samples

| Sample<br>mhbb ID | Genomic<br>DNA<br>Mean $\pm$ s.d. | Caudate<br>cDNA<br>Mean $\pm$ s.d. | Nucleus Accumbens<br>cDNA<br>Mean $\pm$ s.d |
|-------------------|-----------------------------------|------------------------------------|---------------------------------------------|
| 553               | 1.00 $\pm$ 0.03                   | 1.00 $\pm$ 0.06                    | 0.97 $\pm$ 0.04                             |
| 584               | 1.00 $\pm$ 0.19                   | 2.23 $\pm$ 0.31                    | 2.14 $\pm$ 0.23                             |
| 601               | 1.00 $\pm$ 0.10                   | 1.90 $\pm$ 0.17                    | 1.81 $\pm$ 0.13                             |
| A94189            | 1.00 $\pm$ 0.10                   | 1.65 $\pm$ 0.10                    | 1.81 $\pm$ 0.10                             |
| 10066             | 1.00 $\pm$ 0.16                   | 1.59 $\pm$ 0.11                    | 1.72 $\pm$ 0.19                             |
| 10067             | 1.00 $\pm$ 0.10                   | 2.03 $\pm$ 0.14                    | 1.29 $\pm$ 0.08                             |
| 10094             | 1.00 $\pm$ 0.06                   | 2.18 $\pm$ 0.24                    | 1.75 $\pm$ 0.21                             |
| A9695             | 1.00 $\pm$ 0.07                   | 2.06 $\pm$ 0.16                    | 1.79 $\pm$ 0.15                             |

Brains A9695 and A94189 are from Alzheimer's Disease Research Center

Supplementary Table S6

Linkage disequilibrium measures for markers in PDYN in control samples  
(comparison with HapMap database)

|            |            | This study - Caucasians |                | HapMap* - CEU |                |
|------------|------------|-------------------------|----------------|---------------|----------------|
| marker 1   | marker 2   | D'                      | r <sup>2</sup> | D'            | r <sup>2</sup> |
| rs2235749  | rs910079   | 1                       | 1              | 1             | 0.95           |
| rs2235749  | rs910080   | 1                       | 1              | 1             | 0.95           |
| rs2235749  | rs10485703 | 1                       | 0.25           | 1             | 0.394          |
| rs2235749  | rs6045819  | 0.837                   | 0.199          | 0.65          | 0.232          |
| rs2235749  | rs1997794  | 0.941                   | 0.504          | 0.807         | 0.366          |
| rs910079   | rs910080   | 1                       | 1              | 1             | 1              |
| rs910079   | rs10485703 | 1                       | 0.25           | 1             | 0.42           |
| rs910079   | rs6045819  | 0.837                   | 0.199          | 0.669         | 0.261          |
| rs910079   | rs1997794  | 0.941                   | 0.504          | 0.873         | 0.398          |
| rs910080   | rs10485703 | 1                       | 0.25           | 1             | 0.455          |
| rs910080   | rs6045819  | 0.837                   | 0.199          | 0.704         | 0.301          |
| rs910080   | rs1997794  | 0.941                   | 0.504          | 0.882         | 0.419          |
| rs10485703 | rs6045819  | 0.864                   | 0.658          | 1             | 0.748          |
| rs10485703 | rs1997794  | 1                       | 0.142          | 0.887         | 0.193          |
| rs6045819  | rs1997794  | 0.789                   | 0.1            | 0.911         | 0.272          |

  

|            |            | This Study--African Amer. |                | HapMap - YRI |                |
|------------|------------|---------------------------|----------------|--------------|----------------|
| marker 1   | marker 2   | D'                        | r <sup>2</sup> | D'           | r <sup>2</sup> |
| rs2235749  | rs910079   | 1                         | 1              | 1            | 0.964          |
| rs2235749  | rs910080   | 1                         | 0.899          | 1            | 0.896          |
| rs2235749  | rs10485703 | 1                         | 0.22           | 1            | 0.241          |
| rs2235749  | rs6045819  | 0.336                     | 0.052          | 0.481        | 0.115          |
| rs2235749  | rs1997794  | 0.174                     | 0.007          | 0.2          | 0.006          |
| rs910079   | rs910080   | 1                         | 0.899          | 1            | 0.934          |
| rs910079   | rs10485703 | 1                         | 0.22           | 1            | 0.264          |
| rs910079   | rs1997794  | 0.174                     | 0.007          | 0.328        | 0.018          |
| rs910080   | rs10485703 | 1                         | 0.244          | 1            | 0.291          |
| rs910080   | rs1997794  | 0.314                     | 0.021          | 0.351        | 0.022          |
| rs10485703 | rs6045819  | 0.797                     | 0.302          | 0.93         | 0.380          |
| rs10485703 | rs1997794  | 0.101                     | 0.001          | 0.356        | 0.005          |
| rs6045819  | rs1997794  | 0.197                     | 0.004          | 0.057        | 0.000          |

\* - HapMap data (Rel23a/PHASEII, 03/08, NCBI B36, dbSNP 126)
